# Supplementary material
Source: ML conference proceedings conference paper supplement (https://openaccess.thecvf.com/content/CVPR2021/html/Rai_Home_Action_Genome_CVPR_2021_paper.html)
Supplement: Supplementary file 2 [file Rai_Home_Action_Genome_CVPR_2021_supplemental.zip]

Archive with 2 entries (2 files):
- 10838-supp.mp4
- 10838-supp.pdf
